# Supplementary material for: Impact of spiking neurons leakages and network recurrences on event-based spatio-temporal pattern recognition
Source: Frontiers journal article supplement (doi:10.3389/fnins.2023.1244675), 2023-11-24
Supplement: Table_1.PDF [file Table_1.PDF]

## Supplementary Material

Table S1 and Table S2 show the grid search results obtained by initializing time constants to the same values of standard training and incorporating them in the training process. the results show that performance is still sensitive to initial tuning of time constants.

**Table S1.** Heterogeneous training accuracy in FSNN for different initial values of time constants.

**Table 1a.** SHD

| (ms)                                          | LIF                                     | CUBA-LIF                                     |                                              |                                              |                                               |  |
|-----------------------------------------------|-----------------------------------------|----------------------------------------------|----------------------------------------------|----------------------------------------------|-----------------------------------------------|--|
|                                               | $\tau_{syn} = 0$ ( $\alpha \approx 0$ ) | $\tau_{syn} = 14$ ( $\alpha \approx 0.368$ ) | $\tau_{syn} = 28$ ( $\alpha \approx 0.606$ ) | $\tau_{syn} = 70$ ( $\alpha \approx 0.818$ ) | $\tau_{syn} = 140$ ( $\alpha \approx 0.905$ ) |  |
| $\tau_{mem} = 420$ ( $\beta \approx 0.967$ )  | 75.67%                                  | 76.07%                                       | 74.80%                                       | 71.52%                                       | 66.23%                                        |  |
| $\tau_{mem} = 700$ ( $\beta \approx 0.980$ )  | 78.09%                                  | 76.78%                                       | 75.44%                                       | 72.62%                                       | 67.40%                                        |  |
| $\tau_{mem} = 1120$ ( $\beta \approx 0.987$ ) | 78.02%                                  | 76.23%                                       | 75.52%                                       | 71.94%                                       | 67.89%                                        |  |
| $\tau_{mem} = 1680$ ( $\beta \approx 0.992$ ) | 79.84%                                  | 78.69%                                       | 76.78%                                       | 72.79%                                       | 66.79%                                        |  |

**Table 1b.** N-MNIST

| (ms)                                          | LIF                                     | CUBA-LIF                                     |                                              |                                              |                                               |  |
|-----------------------------------------------|-----------------------------------------|----------------------------------------------|----------------------------------------------|----------------------------------------------|-----------------------------------------------|--|
|                                               | $\tau_{syn} = 0$ ( $\alpha \approx 0$ ) | $\tau_{syn} = 14$ ( $\alpha \approx 0.368$ ) | $\tau_{syn} = 28$ ( $\alpha \approx 0.606$ ) | $\tau_{syn} = 70$ ( $\alpha \approx 0.818$ ) | $\tau_{syn} = 140$ ( $\alpha \approx 0.905$ ) |  |
| $\tau_{mem} = 420$ ( $\beta \approx 0.967$ )  | 97.41%                                  | 97.08%                                       | 96.75%                                       | 95.86%                                       | 95.68%                                        |  |
| $\tau_{mem} = 700$ ( $\beta \approx 0.980$ )  | 97.24%                                  | 97.24%                                       | 96.74%                                       | 95.91%                                       | 95.65%                                        |  |
| $\tau_{mem} = 1120$ ( $\beta \approx 0.987$ ) | 97.37%                                  | 97.15%                                       | 96.65%                                       | 96.14%                                       | 95.51%                                        |  |
| $\tau_{mem} = 1680$ ( $\beta \approx 0.992$ ) | 97.34%                                  | 97.08%                                       | 96.86%                                       | 96.20%                                       | 95.50%                                        |  |

**Table S2.** Heterogeneous training accuracy in RSNN for different initial values of time constants.

**Table 2a.** SHD

| (ms)                                          | LIF                                     | CUBA-LIF                                     |                                              |                                              |                                               |  |
|-----------------------------------------------|-----------------------------------------|----------------------------------------------|----------------------------------------------|----------------------------------------------|-----------------------------------------------|--|
|                                               | $\tau_{syn} = 0$ ( $\alpha \approx 0$ ) | $\tau_{syn} = 14$ ( $\alpha \approx 0.368$ ) | $\tau_{syn} = 28$ ( $\alpha \approx 0.606$ ) | $\tau_{syn} = 70$ ( $\alpha \approx 0.818$ ) | $\tau_{syn} = 140$ ( $\alpha \approx 0.905$ ) |  |
| $\tau_{mem} = 420$ ( $\beta \approx 0.967$ )  | 83.27%                                  | 81.48%                                       | 81.48%                                       | 79.00%                                       | 75.58%                                        |  |
| $\tau_{mem} = 700$ ( $\beta \approx 0.980$ )  | 83.47%                                  | 82.84%                                       | 81.75%                                       | 76.90%                                       | 75.52%                                        |  |
| $\tau_{mem} = 1120$ ( $\beta \approx 0.987$ ) | 83.10%                                  | 82.21%                                       | 81.07%                                       | 78.05%                                       | 77.04%                                        |  |
| $\tau_{mem} = 1680$ ( $\beta \approx 0.992$ ) | 83.10%                                  | 82.35%                                       | 80.90%                                       | 79.29%                                       | 76.47%                                        |  |

**Table 2b.** N-MNIST

| (ms)                                          | LIF                                     | CUBA-LIF                                     |                                              |                                              |                                               |  |
|-----------------------------------------------|-----------------------------------------|----------------------------------------------|----------------------------------------------|----------------------------------------------|-----------------------------------------------|--|
|                                               | $\tau_{syn} = 0$ ( $\alpha \approx 0$ ) | $\tau_{syn} = 14$ ( $\alpha \approx 0.368$ ) | $\tau_{syn} = 28$ ( $\alpha \approx 0.606$ ) | $\tau_{syn} = 70$ ( $\alpha \approx 0.818$ ) | $\tau_{syn} = 140$ ( $\alpha \approx 0.905$ ) |  |
| $\tau_{mem} = 420$ ( $\beta \approx 0.967$ )  | 97.25%                                  | 97.07%                                       | 96.74%                                       | 96.08%                                       | 95.64%                                        |  |
| $\tau_{mem} = 700$ ( $\beta \approx 0.980$ )  | 97.24%                                  | 96.92%                                       | 96.79%                                       | 96.17%                                       | 95.59%                                        |  |
| $\tau_{mem} = 1120$ ( $\beta \approx 0.987$ ) | 97.38%                                  | 97.14%                                       | 96.55%                                       | 96.00%                                       | 95.76%                                        |  |
| $\tau_{mem} = 1680$ ( $\beta \approx 0.992$ ) | 97.23%                                  | 97.02%                                       | 96.49%                                       | 96.00%                                       | 95.41%                                        |  |
